# Supplementary material for: Poly(urethane-norbornene) Aerogels via Ring Opening Metathesis Polymerization of Dendritic Urethane-Norbornene Monomers: Structure-Property Relationships as a Function of an Aliphatic Versus an Aromatic Core and the Number of Peripheral Norbornene Moieties
Source: PubMed Central journal article supplement (PMC6102535; doi:10.3390/molecules23051007), 2018-04-25
Supplement: molecules-23-01007-s001.pdf [file molecules-23-01007-s001.pdf]

*Supporting Information*

# Poly(urethane norbornene) Aerogels *via* Ring Opening Metathesis Polymerization of Dendritic Urethane-norbornene Monomers: Structure-property Relationships as a Function of an Aliphatic Versus an Aromatic Core and the Number of Peripheral Norbornene Moieties

Aspasia Kanellou <sup>1</sup>, George C. Anyfantis <sup>2</sup>, Despoina Chriti <sup>1</sup>, Grigorios Raptopoulos <sup>1</sup>, Marinos Pitsikalis <sup>3</sup> and Patrina Paraskevopoulou <sup>1,\*</sup>

<sup>1</sup> Laboratory of Inorganic Chemistry, Department of Chemistry, National and Kapodistrian University of Athens, Panepistimiopolis Zografou, Athens 15771, Greece; aspasiakan@hotmail.com (A.K.); chritides@chem.uoa.gr (D.C.); grigorisrap@chem.uoa.gr (G.R.); paraskevopoulou@chem.uoa.gr (P.P.)

<sup>2</sup> Department of Materials Science, University of Patras, University Campus, Rio 26504, Greece; gc.anyfantis@gmail.com (G.C.A.)

<sup>3</sup> Laboratory of Industrial Chemistry, Department of Chemistry, National and Kapodistrian University of Athens, Panepistimiopolis Zografou, Athens 15771, Greece; pitsikalis@chem.uoa.gr (M.P.)

\* Correspondence: paraskevopoulou@chem.uoa.gr (P.P.); Tel.: +30-210-727-4381; Fax: +30-210-727-4782

## Contents

|                                                                                                                                                                                                                                              | Page |
|----------------------------------------------------------------------------------------------------------------------------------------------------------------------------------------------------------------------------------------------|------|
| <b>Figure S1</b> ATR-FTIR spectra of aliphatic (aLNor) and aromatic (aRNor) aerogels.                                                                                                                                                        | S2   |
| <b>Figure S2</b> Theoretical (blue) and experimental (black) mass spectra for the [M+Na] <sup>+</sup> isotopes of aL-9-NBE. It is obvious that there is very good fit between the theoretical and experimental isotopic pattern (50 mSigma). | S2   |
| <b>Figure S3</b> Theoretical (blue) and experimental (black) mass spectra for the [M+Na] <sup>+</sup> isotopes of aR-9-NBE. It is obvious that there is very good fit between the theoretical and experimental isotopic pattern (34 mSigma). | S2   |

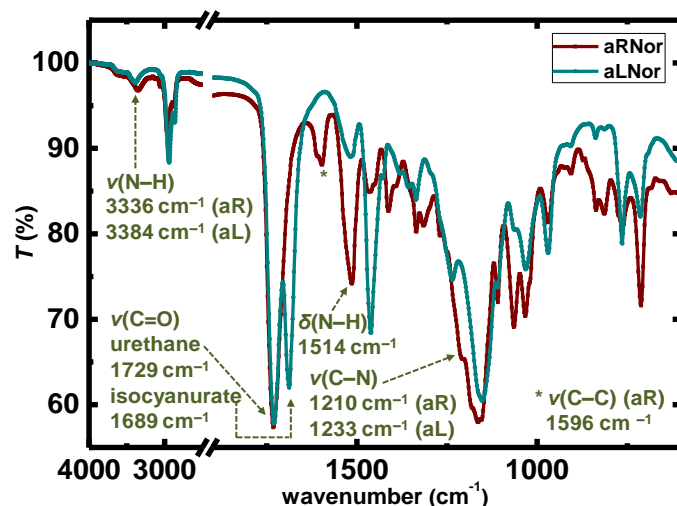

**Figure S1:** ATR-FTIR spectra of aliphatic (aLNor) and aromatic (aRNor) aerogels.

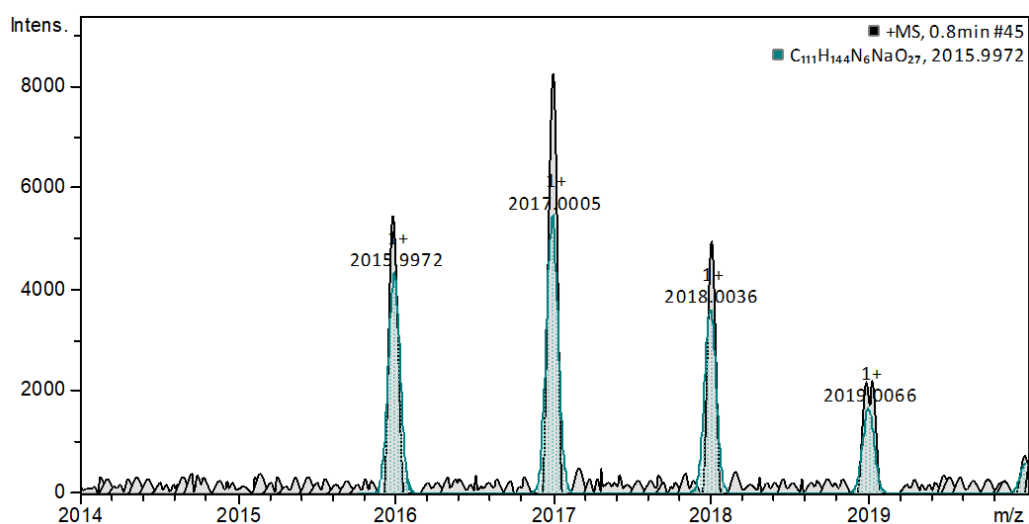

**Figure S2.** Theoretical (blue) and experimental (black) mass spectra for the  $[M+Na]^+$  isotopes of aL-9-NBE. It is obvious that there is very good fit between the theoretical and experimental isotopic pattern (50 mSigma).

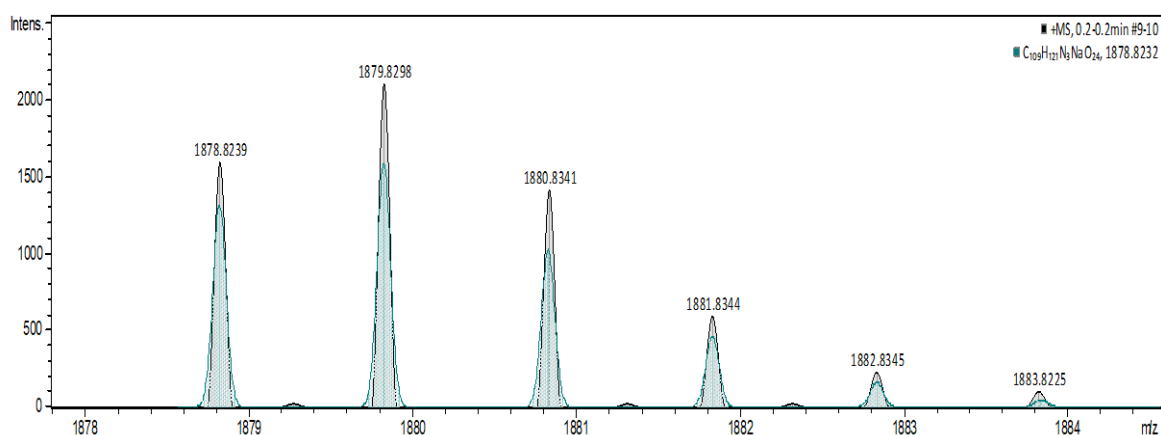

**Figure S3.** Theoretical (blue) and experimental (black) mass spectra for the  $[M+Na]^+$  isotopes of aR-9-NBE. It is obvious that there is very good fit between the theoretical and experimental isotopic pattern (34 mSigma).
